# Supplementary material for: Ultrafine Co2P nanoparticles encapsulated in nitrogen and phosphorus dual-doped porous carbon nanosheet/carbon nanotube hybrids: high-performance bifunctional electrocatalysts for overall water splitting
Source: Royal Society of Chemistry journal article supplement (doi:10.1039/c6ta05485d), 2016-01-01
Supplement: c6ta05485d1.pdf [file c6ta05485d1.pdf]

**Supporting Information for**

**Ultrafine Co<sub>2</sub>P Nanoparticles Encapsulated in Nitrogen and Phosphorus Dual-doped Porous Carbon Nanosheet/Carbon Nanotube Hybrids: High-Performance Bifunctional Electrocatalyst for Overall Water Splitting**

Xinzhe Li, Yiyun Fang, Feng Li, Min Tian, Xuefeng Long, Jun Jin\* and Jiantai Ma\*

State Key Laboratory of Applied Organic Chemistry, The Key Laboratory of Catalytic Engineering of Gansu Province and Chemical Engineering, College of Chemistry and Chemical Engineering, Lanzhou University, Lanzhou, 730000, P. R. China. E-mail: jinjun@lzu.edu.cn, majiantai@lzu.edu.cn.

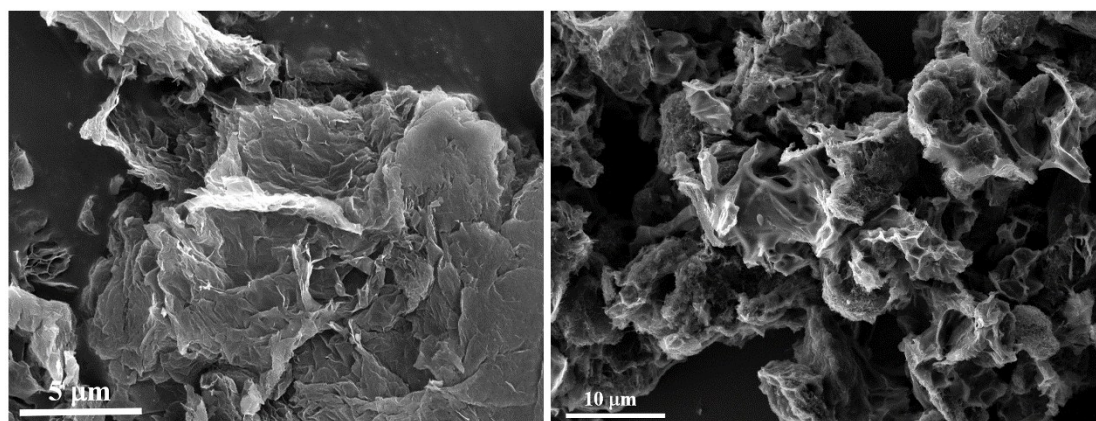

**Fig. S1** SEM images of (a) Co<sub>2</sub>P@N, P-PCN and (b) Co<sub>2</sub>P@N, P-PCN/CNTs.

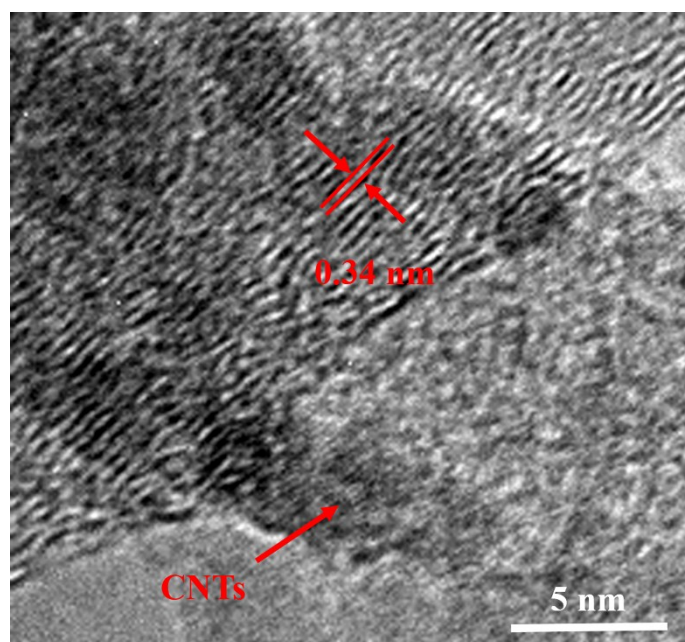

Fig. S2 HRTEM image of Co<sub>2</sub>P@N, P-PCN/CNTs.

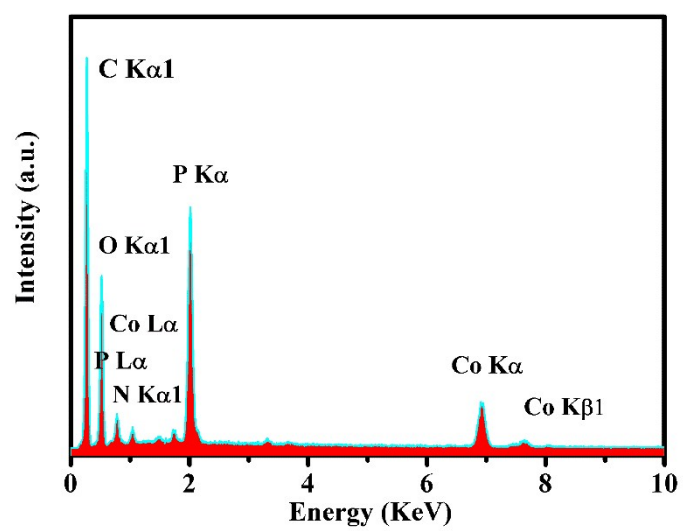

Fig. S3 EDX spectrum of Co<sub>2</sub>P@N, P-PCN/CNTs.

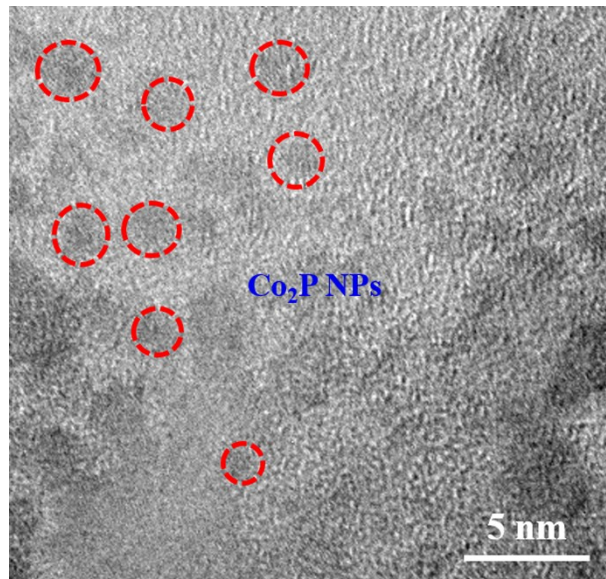

**Fig. S4** TEM image of Co<sub>2</sub>P@N, P-PCN/CNTs.

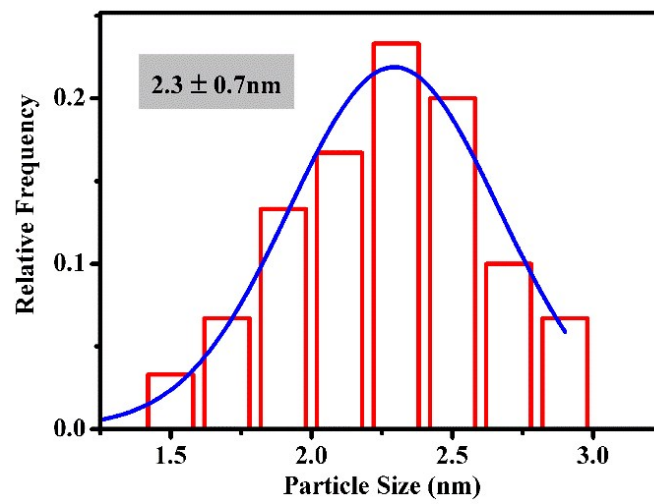

**Fig. S5** Size distribution histograms of Co<sub>2</sub>P NPs.

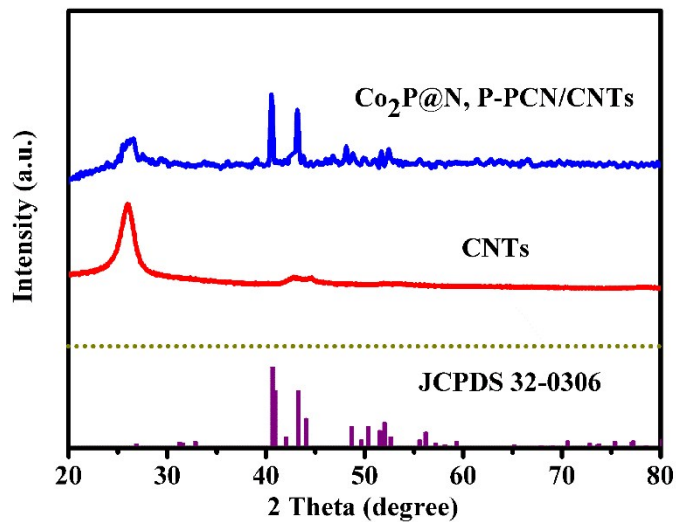

**Fig. S6** Wide-angle XRD patterns of CNTs and  $\text{Co}_2\text{P@N}$ , P-PCN/CNTs.

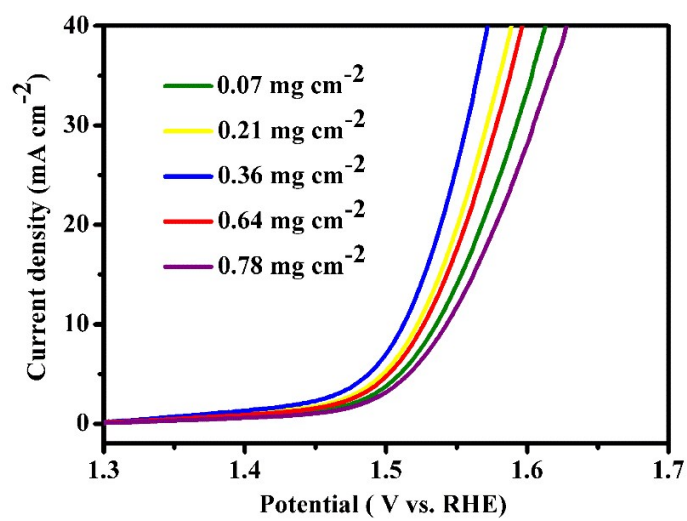

**Fig. S7** LSVs curves for  $\text{Co}_2\text{P@N}$ , P-PCN/CNTs at five different mass loadings in  $\text{O}_2$ -saturated 1.0 M KOH solution.

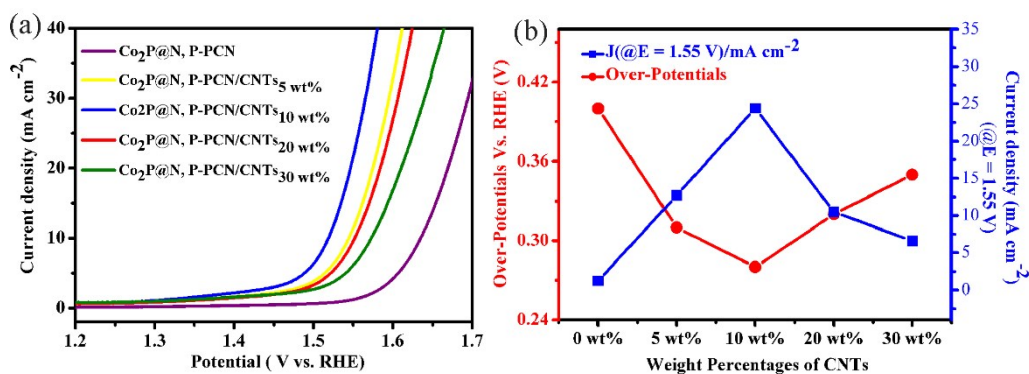

**Fig. S8** (a) LSVs curves of Co<sub>2</sub>P@N, P-PCN, Co<sub>2</sub>P@N, P-PCN/CNTs<sub>5</sub> wt%, Co<sub>2</sub>P@N, P-PCN/CNTs<sub>10</sub> wt%, Co<sub>2</sub>P@N, P-PCN/CNTs<sub>20</sub> wt% and Co<sub>2</sub>P@N, P-PCN/CNTs<sub>30</sub> wt% in an O<sub>2</sub>-saturated 1.0 M KOH solution (scan rate 0.5 mV s<sup>-1</sup>). (b) CNTs weight percentage-dependent over-potential (10 mAcm<sup>-2</sup>) and current density (E = 1.55 V) plots of the products.

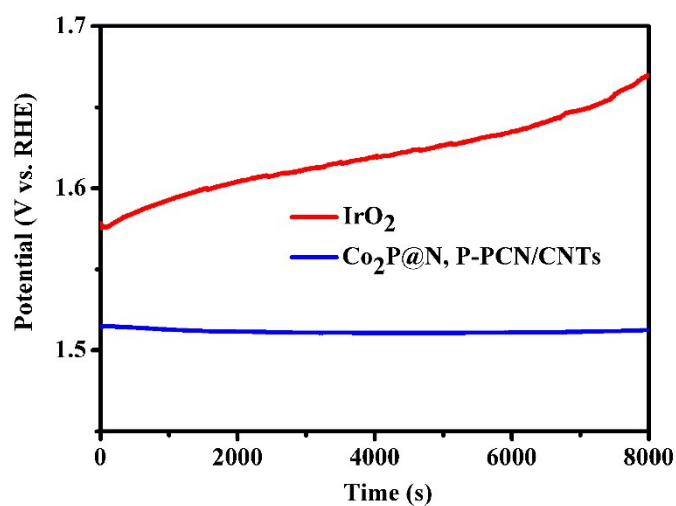

**Fig. S9** Chronopotentiometric response at a constant current density of 10.0 mA cm<sup>-2</sup> recorded for Co<sub>2</sub>P@N, P-PCN/CNTs and commercial IrO<sub>2</sub> catalyst.



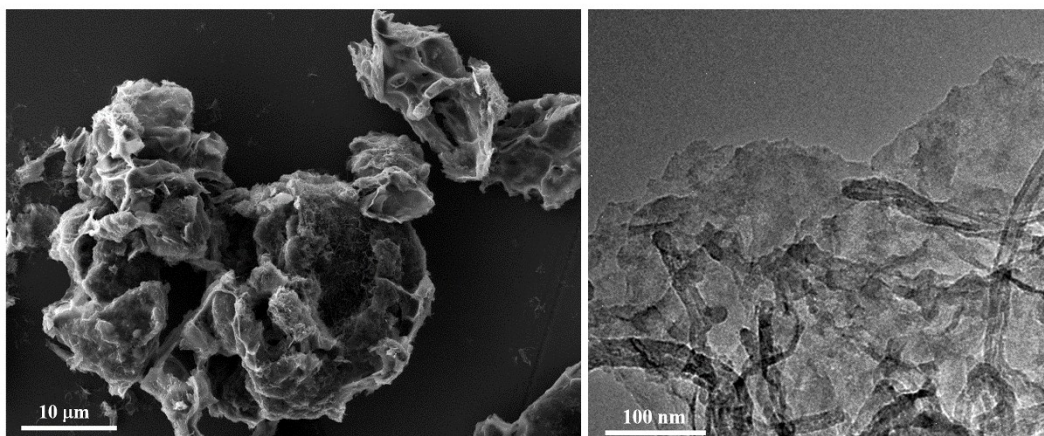

**Fig. S10** SEM and TEM characterizations of  $\text{Co}_2\text{P}@N$ , P-PCN/CNTs after the chronopotentiometry test.

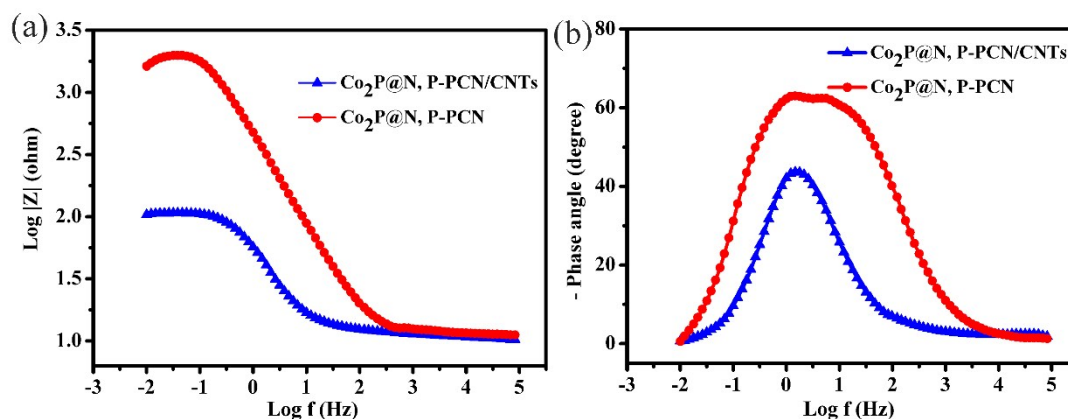

**Fig. S11** EIS Bode plots for  $\text{Co}_2\text{P}@N$ , P-PCN and  $\text{Co}_2\text{P}@N$ , P-PCN/CNTs. Bode plots show the information of impedance, frequency and phase angle. Fig. S11 were the Bode plots for the data in Fig. 5a. The axes of both impedance modulus  $|Z|$  and frequency ( $f$ ) were logarithmic. The impedance of the system measured in the low frequency range is closely related to the polarization resistance (or  $R_{ct}$ ), which is affected by the kinetics of the electrode reactions. As can be seen, the impedance at low-frequency range ( $10^{-2}$  Hz) increased in the order CNTs-

$\text{Co}_2\text{P}@N$ , P-PCN/CNTs <  $\text{Co}_2\text{P}@N$ , P-PCN, which in accordance with the Nyquist plots.

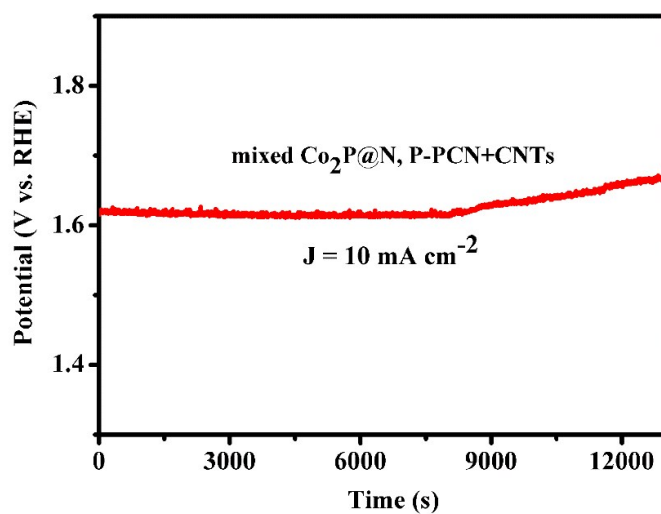

**Fig. S12** Chronopotentiometry curve of physically mixed  $\text{Co}_2\text{P}@N$ , P-PCN+CNTs at a current density of  $10 \text{ mA cm}^{-2}$  in 1.0 M KOH.

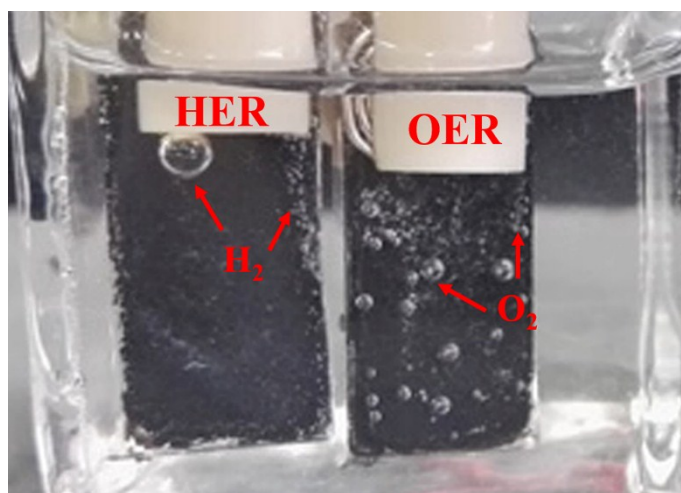

**Fig. S13** The photograph of overall water splitting powered by a battery with a nominal voltage of 1.5 V.

**Table S1** XPS results of Co<sub>2</sub>P@N, P-PCN/CNTs on the atomic percentages of C, O, N, P and the Co distributions.

| C (%) | O (%) | N (%) | P (%) | Co (%) | N distribution (%) |            |             |              |
|-------|-------|-------|-------|--------|--------------------|------------|-------------|--------------|
|       |       |       |       |        | pyridinic N        | pyrrolic N | graphitic N | oxygenated N |
| 74.91 | 3.27  | 9.43  | 9.38  | 3.01   | 38.74              | 27.17      | 28.58       | 5.51         |

**Table S2** Comparison of the OER activity for several recently reported high performance OER catalysts.

| Catalyst                                                        | Onset potential<br>(V) | $\eta@10.0 \text{ mA cm}^{-2}$<br>(V) | Tafel slope<br>(mV dec <sup>-1</sup> ) | Electrolyte | Reference |
|-----------------------------------------------------------------|------------------------|---------------------------------------|----------------------------------------|-------------|-----------|
| Co <sub>2</sub> P@N, P-PCN/CNTs                                 | 1.46                   | 0.28                                  | 49                                     | 1.0 M KOH   | This work |
| Ni-Co ADHs nanocages                                            | 1.50                   | 0.35                                  | 65                                     | 1.0 M KOH   | 1         |
| Co-P/NC                                                         | ~ 1.50                 | 0.35                                  | 52                                     | 1.0 M KOH   | 2         |
| N-doped graphene-CoO                                            | ~ 1.52                 | 0.34                                  | 71                                     | 1.0 M KOH   | 3         |
| CQDs/SnO <sub>2</sub> -Co <sub>3</sub> O <sub>4</sub>           | 1.51                   | ~0.33                                 | 60                                     | 1.0 M KOH   | 4         |
| CuCo <sub>2</sub> O <sub>4</sub> /NrGO                          | ~1.50                  | 0.36                                  | 64                                     | 1.0 M KOH   | 5         |
| Co <sub>3</sub> O <sub>4</sub> @C-MWCNTs                        | 1.50                   | 0.32                                  | 62                                     | 1.0 M KOH   | 6         |
| Co <sub>0.5</sub> Fe <sub>0.5</sub> S@N-MC                      | 1.6                    | 0.64                                  | 159                                    | 1.0 M KOH   | 7         |
| CNTs-Au@Co <sub>3</sub> O <sub>4</sub>                          | 1.52                   | 0.35                                  | 68                                     | 1.0 M KOH   | 8         |
| Au@Co <sub>3</sub> O <sub>4</sub> /C                            | 1.52                   | 0.38                                  | 60                                     | 0.1 M KOH   | 9         |
| Zn <sub>x</sub> Co <sub>3-x</sub> O <sub>4</sub> nanowire array | ~ 1.50                 | 0.32                                  | 51                                     | 1.0 M KOH   | 10        |



|                                                           |        |        |    |           |    |
|-----------------------------------------------------------|--------|--------|----|-----------|----|
| Ni <sub>x</sub> Co <sub>3-x</sub> O <sub>4</sub> nanowire | ~ 1.58 | ~ 0.37 | 64 | 1.0 M KOH | 11 |
| Mn <sub>3</sub> O <sub>4</sub> /CoSe <sub>2</sub>         | /      | 0.45   | 49 | 0.1 M KOH | 12 |

**Notes:** For the convenience of comparison, the measure potentials vs. Ag/AgCl were converted to a reversible hydrogen electrode (RHE) scale according to the Nerst equation ( $E_{\text{RHE}} = E_{\text{Ag/AgCl}} + 0.059 \times \text{pH} + 0.198$ ).

**Table S3** Comparison of HER performance in 1.0 M KOH solution for Co<sub>2</sub>P@N, P-PCN/CNTs with other non-noble metal electrocatalysts.

| Catalyst                        | Onset potential<br>(V) | $\eta@10.0 \text{ mA cm}^{-2}$<br>(V) | Tafel slope<br>(mV dec <sup>-1</sup> ) | Reference |
|---------------------------------|------------------------|---------------------------------------|----------------------------------------|-----------|
| Co <sub>2</sub> P@N, P-PCN/CNTs | 33                     | 154                                   | 52                                     | This work |
| MoC <sub>x</sub>                | 25                     | 151                                   | 59                                     | 13        |
| CoNi@NC                         | ~ 0                    | 142                                   | 104                                    | 14        |
| Cu <sub>3</sub> P NW/CF         | /                      | 143                                   | 67                                     | 15        |
| CoP/RGO                         | /                      | ~ 250                                 | 104.8                                  | 16        |
| Co <sub>2</sub> P nanorods      | 70                     | 134                                   | 71                                     | 17        |
| CoO <sub>x</sub> @CN            | 85                     | 232                                   | /                                      | 18        |
| MoS <sub>2+x</sub> /FTO         | /                      | 310                                   | /                                      | 19        |
| CoP/CC                          | /                      | 209                                   | 129                                    | 20        |
| Co-NRCNTs                       | 100                    | 370                                   | /                                      | 21        |
| FeP NAs/CC                      | ~ 20                   | 218                                   | 146                                    | 22        |

**Table S4** Comparison of OER and HER performance in 1.0 M KOH solution for Co<sub>2</sub>P@N, P-PCN/CNTs with other non-noble metal bifunctional electrocatalysts.

| Catalyst                        | H <sub>OER</sub> @10.0 mA cm <sup>-2</sup> | H <sub>HER</sub> @10.0 mA cm <sup>-2</sup> | E (V) <sup>[1]</sup> | Reference |
|---------------------------------|--------------------------------------------|--------------------------------------------|----------------------|-----------|
| Co <sub>2</sub> P@N, P-PCN/CNTs | 280                                        | 154                                        | 1.64                 | This work |
| Ni <sub>5</sub> P <sub>4</sub>  | 340                                        | 150                                        | ~ 1.7                | 23        |
| CoO <sub>x</sub> @CN            | 260                                        | 235                                        | ~ 1.3                | 18        |
| NiFe LDH/Ni foam                | 240                                        | 210                                        | 1.7                  | 24        |
| PCPTF                           | ~ 310                                      | ~ 380                                      | /                    | 25        |
| CoP/rGO                         | 340                                        | 150                                        | 1.7                  | 26        |
| Co-P film                       | 345                                        | 94                                         | ~ 1.64               | 27        |
| Co-P/NC                         | 319                                        | 154                                        | ~ 1.71               | 2         |
| NiSe/Ni foam                    | /                                          | 96                                         | 1.63                 | 28        |
| PNC/Co                          | ~ 370                                      | 298                                        | 1.64                 | 29        |

**Notes:** [1] represents the overall water splitting overpotentials at 10 mA cm<sup>-2</sup>.

## References

1. J. Nai, H. Yin, T. You, L. Zheng, J. Zhang, P. Wang, Z. Jin, Y. Tian, J. Liu, Z. Tang and L. Guo, *Adv. Energy Mater.*, 2015, **5**, 1401880.
2. B. You, N. Jiang, M. Sheng, S. Gul, J. Yano and Y. Sun, *Chem. Mater.*, 2015, **27**, 7636-7642.
3. S. Mao, Z. Wen, T. Huang, Y. Hou and J. Chen, *Energy Environ. Sci.*, 2014, **7**, 609-616.
4. S. Zhao, C. Li, J. Liu, N. Liu, S. Qiao, Y. Han, H. Huang, Y. Liu and Z. Kang, *Carbon*, 2015, **92**, 64-73.
5. S. K. Bikkarolla and P. Papakonstantinou, *J. Power Sources*, 2015, **281**, 243-251.
6. X. Li, Y. Fang, X. Lin, M. Tian, X. An, Y. Fu, R. Li, J. Jin and J. Ma, *J. Mater. Chem. A*, 2015, **3**, 17392-17402.
7. M. Shen, C. Ruan, Y. Chen, C. Jiang, K. Ai and L. Lu, *ACS Appl. Mater. Interfaces*, 2015, **7**, 1207-1218.
8. Y. Fang, X. Li, Y. Hu, F. Li, X. Lin, M. Tian, X. An, Y. Fu, J. Jin and J. Ma, *J. Power Sources*, 2015, **300**, 285-293.

9. Z. Zhuang, W. Sheng and Y. Yan, *Adv. Mater.*, 2014, **26**, 3950-3955.
10. X. Liu, Z. Chang, L. Luo, T. Xu, X. Lei, J. Liu and X. Sun, *Chem. Mater.*, 2014, **26**, 1889-1895.
11. Y. Li, P. Hasin and Y. Wu, *Adv. Mater.*, 2010, **22**, 1926-1929.
12. M. R. Gao, Y. F. Xu, J. Jiang, Y. R. Zheng and S. H. Yu, *J. Am. Chem. Soc.*, 2012, **134**, 2930-2933.
13. H. B. Wu, B. Y. Xia, L. Yu, X. Y. Yu and X. W. Lou, *Nat. Commun.*, 2015, **6**, 6512.
14. J. Deng, P. Ren, D. Deng and X. Bao, *Angew. Chem. Int. Ed.*, 2015, **54**, 2100-2104.
15. J. Tian, Q. Liu, N. Cheng, A. M. Asiri and X. Sun, *Angew. Chem. Int. Ed.*, 2014, **53**, 9577-9581.
16. L. Ma, X. Shen, H. Zhou, G. Zhu, Z. Ji and K. Chen, *J. Mater. Chem. A*, 2015, **3**, 5337-5343.
17. Z. Huang, Z. Chen, Z. Chen, C. Lv, M. G. Humphrey and C. Zhang, *Nano Energy*, 2014, **9**, 373-382.
18. H. Jin, J. Wang, D. Su, Z. Wei, Z. Pang and Y. Wang, *J. Am. Chem. Soc.*, 2015, **137**, 2688-2694.
19. C. G. Morales-Guio, L. Liardet, M. T. Mayer, S. D. Tilley, M. Gratzel and X. Hu, *Angew. Chem. Int. Ed.*, 2015, **54**, 664-667.
20. J. Tian, Q. Liu, A. M. Asiri and X. Sun, *J. Am. Chem. Soc.*, 2014, **136**, 7587-7590.
21. X. Zou, X. Huang, A. Goswami, R. Silva, B. R. Sathe, E. Mikmekova and T. Asefa, *Angew. Chem.*, 2014, **53**, 4372-4376.
22. Y. Liang, Q. Liu, A. M. Asiri, X. Sun and Y. Luo, *ACS Catal.*, 2014, **4**, 4065-4069.
23. M. Ledendecker, S. Krick Calderon, C. Papp, H. P. Steinruck, M. Antonietti and M. Shalom, *Angew. Chem. Int. Ed.*, 2015, **54**, 12361-12365.
24. Jingshan Luo, Jeong-Hyeok Im, Matthew T. Mayer, Marcel Schreier, Mohammad Khaja Nazeeruddin, Nam-Gyu Park, S. David Tilley, Hong Jin Fan and M. Grätzel, *Science*, 2014, **345**, 1593-1596.
25. Y. Yang, H. Fei, G. Ruan and J. M. Tour, *Adv. Mater.*, 2015, **27**, 3175-3180.
26. L. Jiao, Y.-X. Zhou and H.-L. Jiang, *Chem. Sci.*, 2016, **7**, 1690-1695.
27. N. Jiang, B. You, M. Sheng and Y. Sun, *Angew. Chem. Int. Ed.*, 2015, **54**, 6251-6254.
28. C. Tang, N. Cheng, Z. Pu, W. Xing and X. Sun, *Angew. Chem. Int. Ed.*, 2015, **54**, 9351-9355.
29. X. Li, Z. Niu, J. Jiang and L. Ai, *J. Mater. Chem. A*, 2016, **4**, 3204-3209.
